# Supplementary material for: New insight into the divergent responses of plants to warming in the context of root endophytic bacterial and fungal communities
Source: PeerJ journal article supplement (doi:10.7717/peerj.11340), 2021-05-26
Supplement: supplementary_figure_S1.pdf [file supplementary_figure_S1.pdf]

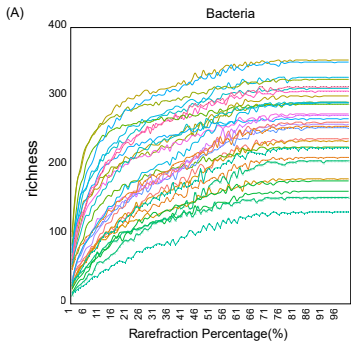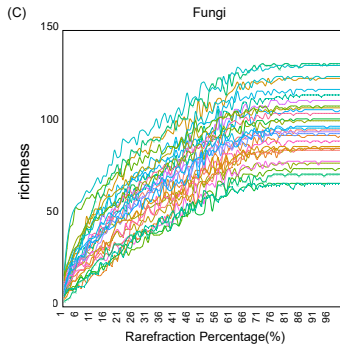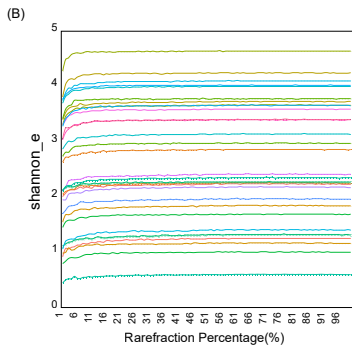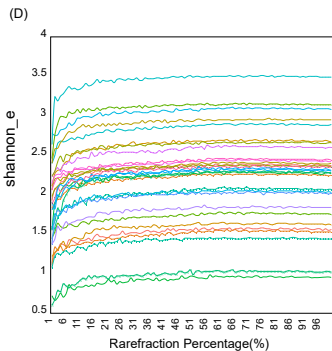

- ER3350.1
- ER3350.3
- KR3350.2
- ER3460.1
- ER3460.3
- KR3460.2
- ER3570.1
- ER3570.3
- KR3570.2
- ER3680.1
- ER3680.3
- KR3680.2
- ER3800.1
- ER3800.3
- KR3800.2
- ER3350.2
- KR3350.1
- KR3350.3
- ER3460.2
- KR3460.1
- KR3460.3
- ER3570.2
- KR3570.1
- KR3570.3
- ER3680.2
- KR3680.1
- KR3680.3
- ER3800.2
- KR3800.1
- KR3800.3
