# Supplementary material for: New insight into the divergent responses of plants to warming in the context of root endophytic bacterial and fungal communities
Source: PeerJ journal article supplement (doi:10.7717/peerj.11340), 2021-05-26

(A) Bacteria

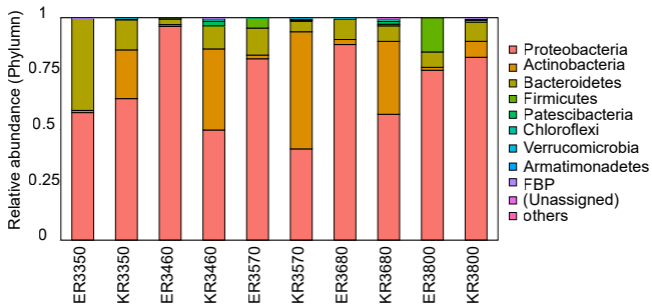

(B) Fungi

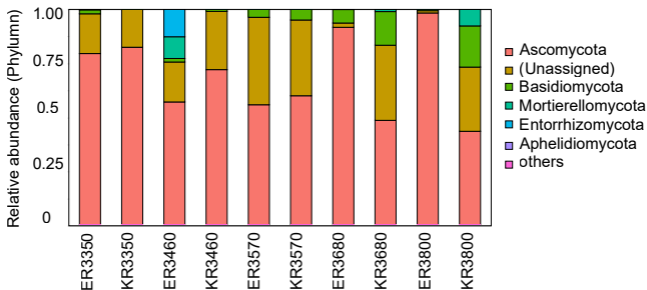

Supplement: supplementary_figure_S2.pdf [file supplementary_figure_S2.pdf]
